# Supplementary material
Source: Springer Nature journal article supplement (https://www.springermedizin.de/resource/supplementary/12876_2006_187_MOESM2_ESM.pdf/9438882)

SPIRAL

LU

OmniPaque  
120kV 100mA  
1.0s 10.0mm  
100mAs  
0m1  
00'00"0  
-15.0mm/s  
+ C

M/040Y  
+208.0mm  
0.0deg  
I#8

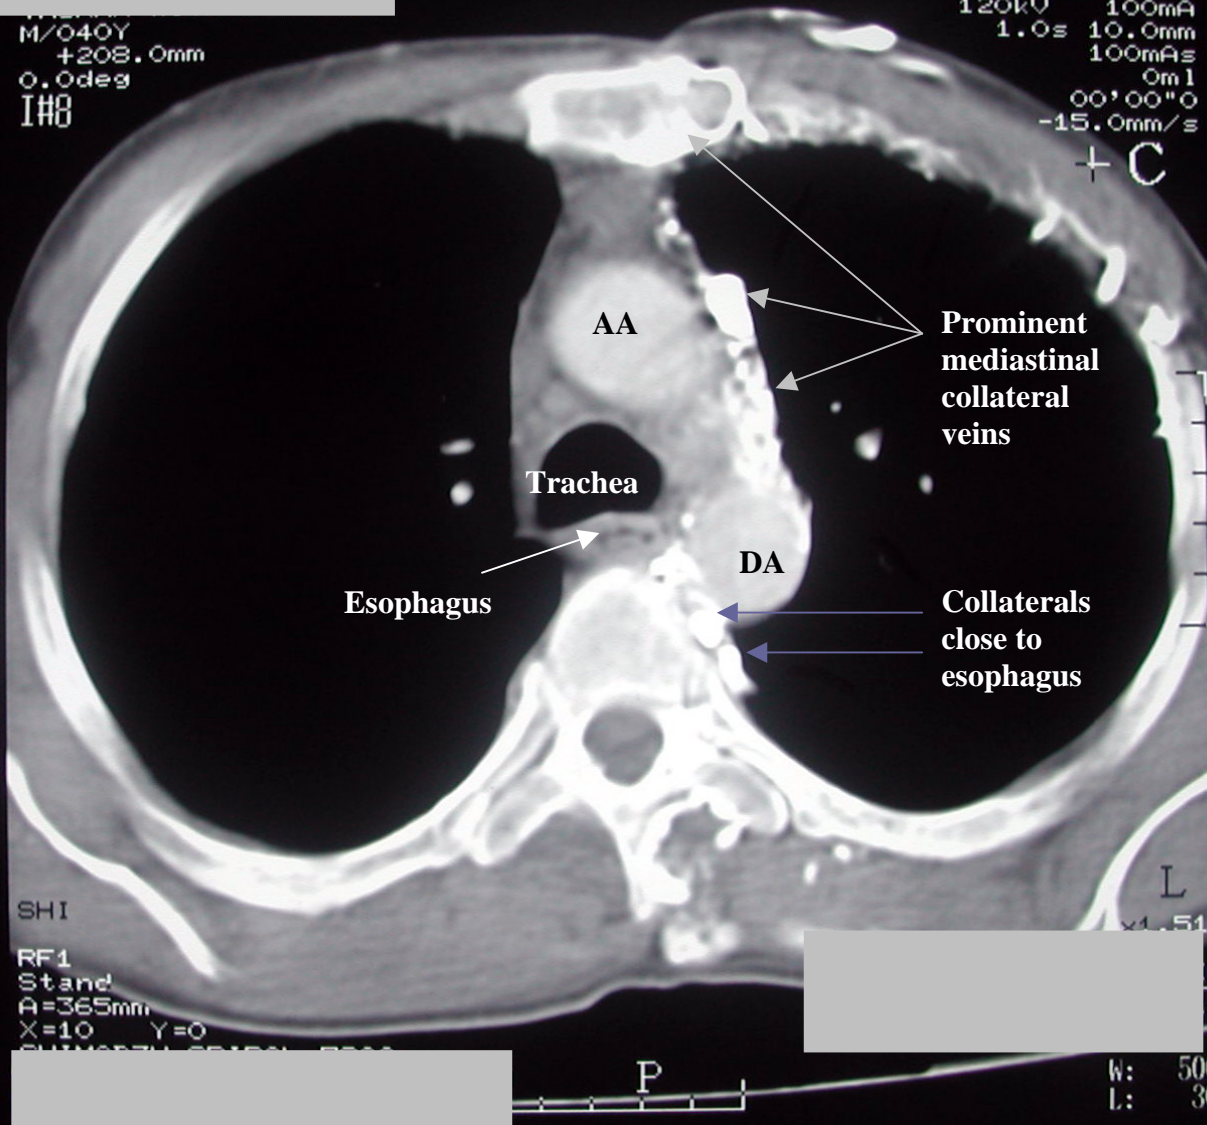

Supplement: MOESM2 [file 9438882]
